# Supplementary material for: Mass spectrometry reveals the assembly pathway of encapsulated ferritins and highlights a dynamic ferroxidase interface
Source: Royal Society of Chemistry journal article supplement (doi:10.1039/c9cc08130e), 2020-01-01
Supplement: c9cc08130e1.pdf [file c9cc08130e1.pdf]

**Electronic Supplementary Information**

**Mass Spectrometry Reveals the Assembly Pathway of Encapsulated Ferritins and Highlights a Dynamic Ferroxidase Interface**

Jennifer Ross<sup>a</sup>, Thomas Lambert<sup>a</sup>, Cecilia Piergentili<sup>b</sup>, Didi He<sup>c</sup>, Kevin J. Waldron<sup>d</sup>, C. Logan Mackay<sup>a</sup>, Jon Marles-Wright<sup>b\*</sup>, David J. Clarke<sup>a\*</sup>

<sup>a</sup> *EaStCHEM School of Chemistry, The University of Edinburgh, Joseph Black Building, David Brewster Road, Edinburgh, Scotland, EH9 3FJ*  
Email: [Dave.clarke@ed.ac.uk](mailto:Dave.clarke@ed.ac.uk)

<sup>b</sup> *School of Natural and Environmental Sciences, Newcastle University. Newcastle upon Tyne, NE1 7RU*  
Email: [Jon.marles-wright1@ncl.ac.uk](mailto:Jon.marles-wright1@ncl.ac.uk)

<sup>c</sup> *Structural Genomics Consortium, University of Oxford, Old Road Campus Research Building, Roosevelt Drive, Oxford, OX3 7DQ*

<sup>d</sup> *Institute for Cell and Molecular Biosciences, Newcastle University, Newcastle upon Tyne NE2 4HH*

## 28 Contents

|    |                                                                                            |    |
|----|--------------------------------------------------------------------------------------------|----|
| 29 |                                                                                            |    |
| 30 | Materials and Methods.....                                                                 | 4  |
| 31 | Cloning.....                                                                               | 4  |
| 32 | Protein expression and purification.....                                                   | 4  |
| 33 | Mass Spectrometry (LC-MS, Native and Native Ion Mobility MS) .....                         | 4  |
| 34 | Native FT-ICR Mass Spectrometry .....                                                      | 5  |
| 35 | HDX Mass Spectrometry .....                                                                | 5  |
| 36 | Supplementary Tables .....                                                                 | 6  |
| 37 | Table S1. Primers used in this study .....                                                 | 6  |
| 38 | Table S2. Constructs used in this study.....                                               | 6  |
| 39 | Table S3. Average molecular masses of encapsulated ferritins obtained by LC-MS. ....       | 7  |
| 40 | Table S4. Iron content of purified Hoch proteins from ICP-MS analysis.....                 | 7  |
| 41 | Supplementary Figures.....                                                                 | 8  |
| 42 | Figure S1. SDS-PAGE analysis of Hoch-WT and Hoch-H63A proteins after Strep-Trap            |    |
| 43 | purification.....                                                                          | 8  |
| 44 | Figure S2. Native PAGE analysis of Hoch-EncFtn proteins after Strep-Trap purification at   |    |
| 45 | pH 8.0 .....                                                                               | 8  |
| 46 | Figure S3. High Resolution Native FT-ICR Mass Spectra of Hoch-WT (A) and Hoch-H63A         |    |
| 47 | (B). The 10+ Dimer Charge State is shown for each. ....                                    | 9  |
| 48 | Figure S4. Iron Mediated Dimer Association of Hoch-WT .....                                | 10 |
| 49 | HDX MS Results .....                                                                       | 11 |
| 50 | HDX S1. Peptide coverage maps for (A) Hoch-WT and (B) Hoch-H63A after HDX and              |    |
| 51 | pepsin digest.....                                                                         | 11 |
| 52 | HDX S2. Recorded uptake of deuterium for each peptide and timepoint observed in HDX-       |    |
| 53 | MS of Hoch-WT(A) and Hoch-H63A (B). ....                                                   | 13 |
| 54 | HDX S3. Stacked mass spectral data displaying deuterium uptake over time for the four      |    |
| 55 | peptides highlighted in text. Hoch-WT (orange) and Hoch-H63A (magenta).....                | 14 |
| 56 | HDX S4. HDX Uptake plots for the four peptides highlighted in the text. Biological repeats |    |
| 57 | (triplicate) of technical repeats (triplicate) HDX-MS analysis for Hoch-WT. ....           | 15 |
| 58 | HDX S5. HDX Uptake plots for the four peptides highlighted in the text. Biological repeats |    |
| 59 | (triplicate) of technical repeats (triplicate) HDX-MS analysis for Hoch-H63A. ....         | 16 |
| 60 | References.....                                                                            | 17 |

61  
62  
63  
64  
65  
66  
67  
68  
69  
70  
71  
72  
73

## Materials and Methods

### Cloning

Generation of pET28a-Hoch-H63A variant was conducted following the QuikChange® protocol (Stratagene) for site-directed mutagenesis using pET-28a-Hoch\_3836 as template and primers shown in Table S1.

### Protein expression and purification

Protein expression plasmids were transformed into *Escherichia coli* BL21 (DE3) and spread onto LB-agar plates supplemented with kanamycin (35 µg/mL). A flask containing 2\*YT media (10 mL) supplemented with kanamycin (35 µg/mL) was inoculated with an individual colony of *Escherichia coli* BL21 (DE3) from the agar plates and grown overnight at 37 °C, with shaking 200 rpm, to form starter cultures. 2\*YT media (1 L) with kanamycin (35 µg/mL) was inoculated with starter culture (1 mL) and shaken at 37 °C until an OD<sub>600</sub> of 0.6 was reached. Cells were induced with IPTG (1 mM) and shaken overnight, 200 rpm, at 18 °C. Cells were harvested by centrifugation, 5,000 x g at 4 °C, and stored at -20 °C.

Cell pellets were resuspended in Wash Buffer (100 mM Tris.HCl pH 8.0, 150 mM NaCl) and sonicated on ice for 6 minutes (cycles of 30 seconds on/off) to produce cell lysate (MSE Soniprep 150). The lysate was clarified by centrifugation at 12,000 x g and filtered using a .22 µm syringe filter. Filtered lysate was loaded onto a Strep-Trap HP column (5 mL; GE Healthcare) and unbound proteins were washed off with 5 column volumes of Wash Buffer. Hoch-WT/Hoch-H63A was eluted by 6 column volumes of Elution Buffer (100 mM Tris.HCl pH 8.0, 150 mM NaCl, 2.5 mM desthiobiotin) and buffer-exchanged into SEC buffer (20 mM HEPES pH 8.0, and 150 mM NaCl) to remove the desthiobiotin using a centrifugal concentrator (buffer exchanged four times according to the manufacturer's instructions) (Sartorius, 5 kDa MWCO).

### Mass Spectrometry (LC-MS, Native and Native Ion Mobility MS)

LC-MS, native MS (Figure 2 and Figure S4) and ion mobility experiments were performed on a Synapt G2 ion-mobility equipped Q-ToF instrument (Waters Corp., Manchester, UK). LC-MS experiments were performed using an Acquity UPLC equipped with a reverse phase C4 Aeris Widepore 50 × 2.1 mm HPLC column (Phenomenex, CA, USA) and a gradient of 5–95%B (Mobile phases: A= water + 0.1% formic acid, B=acetonitrile + 0.1% formic acid) over 10 minutes was employed. For LC-MS, samples were typically analysed at 5 µM, and data analysis was performed using MassLynx v4.1 and MaxEnt deconvolution. For native MS analysis, all protein samples were buffer exchanged into ammonium acetate (100 mM; pH 8.0) using Micro Biospin Chromatography Columns (Bio-Rad, UK) prior to analysis and the resulting protein samples were analysed at a typical final concentration of ~5 µM (oligomer concentration). For native MS ionization, nano-ESI was employed using a Nanomate nanoelectrospray infusion robot (Advion Biosciences, Ithaca, NY). Instrument parameters were tuned to preserve non-covalent protein complexes and were consistent for the analysis of both Hoch-WT and Hoch-H63A. After native MS optimization, parameters were: nanoelectrospray voltage 1.60 kV; sample cone 100 V; extractor cone 0 V; trap collision voltage 4 V; source temperature 60 °C; and source backing pressure 6.0 mbar. For iron titrations, 50 µM, 100 µM or 150 µM of fresh FeSO<sub>4</sub>·7H<sub>2</sub>O in 0.1% (v/v) HCl was added to Hoch-WT prior to buffer exchange into ammonium acetate (100 mM; pH 8.0). Ion mobility mass spectrometry (IM-MS) was performed using the travelling-wave mobility cell and nitrogen drift gas. The typical conditions used for IM-MS were: wave velocity 300 m/s; wave height 19 V; and sampling cone of 75 V. Collision cross sections (CCS) were determined using Driftscope v2.5 and calibrated using denatured equine myoglobin (Sigma-Aldrich).

## 127 *Native FT-ICR Mass Spectrometry*

128 High resolution native mass spectrometry was performed on a 12T Solarix 2XR FT-ICR MS  
129 (Bruker Daltonics) equipped with an ESI source (Figure 3 and Figure S3). Protein samples  
130 were buffer exchanged into ammonium acetate (100 mM; pH 8.0; as described above) prior  
131 to direct infusion. Source conditions and ion optics were optimised to transmit native proteins  
132 ions and when required, Continual Accumulation of Selected Ions (CASI) was employed to  
133 isolate charge states of interest. Typically, 2 Megaword data was collected in QPD (2 $\pi$ ) mode  
134 to produce a 6 second FID, which resulted in a typical mass resolving power of ca. 300,000.  
135 The resulting data was processed using Data Analysis (Bruker Daltonics) and theoretical  
136 isotope patterns were calculated using IsotopePattern (Bruker Daltonics).

137

## 138 *HDX Mass Spectrometry*

139 Hydrogen–deuterium exchange mass spectrometry (HDX-MS) experiments were performed  
140 on a Synapt G2 HDMS system coupled to an ACQUITY M-Class UPLC with the HDX manager  
141 module (Waters Corporation, Manchester, UK). A custom-built Leap automated platform was  
142 utilised for all sample preparation and injections. For HDX-MS analysis, three buffer solutions  
143 were employed: Equilibration buffer (4.7 mM K<sub>2</sub>HPO<sub>4</sub>, 0.3 mM KH<sub>2</sub>PO<sub>4</sub> and 100 mL H<sub>2</sub>O,  
144 adjusted to pH 8.0 with formic acid). Labelling buffer (4.7 mM K<sub>2</sub>HPO<sub>4</sub>, 0.3 mM KH<sub>2</sub>PO<sub>4</sub> and  
145 90.55 mL D<sub>2</sub>O, adjusted to pH 8.0 with DCl) and Quench buffer (50 mM K<sub>2</sub>HPO<sub>4</sub>, 50 mM  
146 KH<sub>2</sub>PO<sub>4</sub> and 100 mL H<sub>2</sub>O, adjusted to pH 2.3 with formic acid). For each timecourse six  
147 timepoints were performed: T0 (0 minute; undeuterated control), T1 (0.1 minutes), T2 (0.5  
148 minutes), T3 (2 minutes), T4 (5 minutes) and T5 (30 minutes) with each timepoint being  
149 performed in triplicate.

150 For each timepoint, a 32  $\mu$ M protein solution was prepared in equilibration buffer and 5  $\mu$ L of  
151 this protein solution was added to 57  $\mu$ L equilibrium buffer (T0) or labelling buffer (T1-6). The  
152 final concentration of deuterium during the labelling step was 91.2%. Exchange was allowed  
153 to proceed at 4 °C. To arrest the exchange reaction, 50  $\mu$ L of quench buffer was added to this  
154 initial solution and 50  $\mu$ L of this quenched solution was immediately injected into the HDX  
155 manager (held at 1°C). After injection, samples underwent proteolytic digestion on a 2.1 x 30  
156 mm Enzymate BEH pepsin column (Waters) for 3 minutes at 200  $\mu$ L/min. After digestion, the  
157 peptide digest was loaded on an Acquity BEH C18 VanGuard 1.7 $\mu$ m C18 Trapping column to  
158 pre-concentrate the sample for 3 minutes at 200  $\mu$ L/min. Following trapping, the digests were  
159 separated through a 2.1 x 5.0 mm Acquity BEH 1.7  $\mu$ m analytical column prior to MS/MS  
160 analysis via the Water Synapt G2 MS system equipped MassLynx v4.1 software (Waters  
161 Corporation, Manchester, UK). The separation gradient was 5-95% acetonitrile with 0.1%  
162 formic acid over 12 minutes at 40  $\mu$ L/min. Both the trapping and LC separation were performed  
163 at 1°C to minimize back exchange. The MS parameters for this experiment were: capillary  
164 voltage 2.5 kV; sampling cone 30 V; source temperature 80 °C and desolvation temperature  
165 250 °C. The Synapt G2 was calibrated with sodium formate using the Acquity's intellistart  
166 software. In order to apply mass accuracy correction, Leucine Enkephalin (LeuEnk 200 pg/ $\mu$ L,  
167 Sigma) was used as a lock mass flowing at 10  $\mu$ L/min. Post-processing and HDX  
168 quantification was performed using Proteinlynx Global Server 3.0.3 and Dynamx 3.0 software.

169 **Supplementary Tables**

170

171 *Table S1. Primers used in this study*

| Construct | Forward Primer                                   | Reverse Primer                                              | Comment                |
|-----------|--------------------------------------------------|-------------------------------------------------------------|------------------------|
| Hoch-WT   | GGCTTGGTCTCA <u>AAATG</u> GGCAGCAGCGAA<br>CAGCTG | GCGTAGGTCTCT <u>AAGC</u> TTATTCTTCCAGT<br>TCCAGAATCGGACGTTC | Bsal sites             |
| Hoch-H63A | CGAAGAGGTGGAAGCTGCAATGATGACC<br>CTGG             | CCAGGGTCATCATTGCAGCTTCCACCTC<br>TTCG                        | Quickchange<br>primers |

172 All primers were purchased from IDT. Underlined regions represent restriction enzyme recognition sites; highlighted regions represent type IIs  
173 restriction enzyme overhang sites.

174

175 *Table S2. Constructs used in this study*

| Construct | Sequence                                                                                                                          | Amino acids | Average<br>Molecular<br>weight (Da) | pI   | Extinction coefficient<br>(M <sup>-1</sup> cm <sup>-1</sup> ) |
|-----------|-----------------------------------------------------------------------------------------------------------------------------------|-------------|-------------------------------------|------|---------------------------------------------------------------|
| Hoch-WT   | MSSEQLHEPAELLSEETKNMHRALVTLIEELEAV<br>DWYQQRADACSEPGLHDVLIHNKNEEVE <u>H</u> AM<br>MTLEWIRRRSPVFDAMRTYLFTERPILELEER<br>SWSH PQFEK* | 107         | 12798.39                            | 4.97 | 19480                                                         |
| Hoch-H63A | MSSEQLHEPAELLSEETKNMHRALVTLIEELEAV<br>DWYQQRADACSEPGLHDVLIHNKNEEVE <u>A</u> AM<br>MTLEWIRRRSPVFDAMRTYLFTERPILELEER<br>SWSH PQFEK* | 107         | 12732.33                            | 4.88 | 19480                                                         |

**Table S3. Average molecular masses of encapsulated ferritins obtained by LC-MS.**

| Protein   | Observed Mass (Da) | Assignment          | Theoretical Mass (Da) |
|-----------|--------------------|---------------------|-----------------------|
| Hoch-WT   | 12666.19 ± 0.11    | monomer without Met | 12667.20              |
|           | 25331.96 ± 0.47    | dimer without Met   | 25334.40              |
| Hoch-H63A | 12600.90 ± 0.04    | monomer without Met | 12601.13              |

The starting Methionine residue is not always retained, and this has been indicated in "Assignment". Error values generated from MassLynx v4.1.

**Table S4. Iron content of purified Hoch proteins from ICP-MS analysis.**

| Protein   | [Fe]/[protein] % |
|-----------|------------------|
| Hoch-WT   | 29.1 ± 17.1      |
| Hoch-H63A | 5.6 ± 1.5        |

Fe content of protein samples was analysed by ICP-MS on Hoch-WT (results previously published<sup>1</sup>) and Hoch-H63A proteins (monomeric fractions). Proteins were prepared in 50 mM Tris-HCl pH 8.0, 150 mM NaCl. The analysis was performed on n = 3 technical replicates and values shown represent mean average of values and standard deviation.

## Supplementary Figures

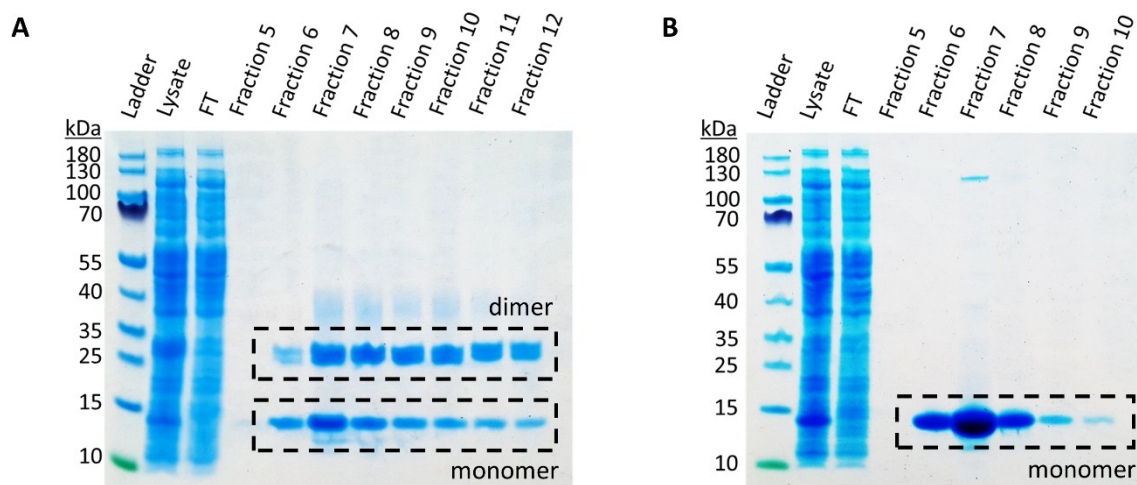

**Figure S1. SDS-PAGE analysis of Hoch-WT and Hoch-H63A proteins after Strep-Trap purification**

SDS-PAGE gels (NuPAGE® Novex® 12 well 4-12% Bis-Tris gels) of Strep-Trap purification fractions for Hoch-WT (**A**) and Hoch-H63A (**B**). Gels have been annotated with observed oligomerisation states. The appearance of bands corresponding to the dimeric form WT EncFtns on SDS-PAGE has been noted before (He et al, eLife, 2016;5:e18972) for Rru-EncFtn.

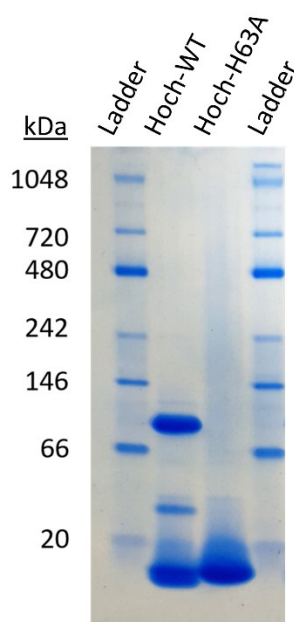

**Figure S2. Native PAGE analysis of Hoch-EncFtn proteins after Strep-Trap purification at pH 8.0**

Samples of purified Hoch-WT and Hoch-H63A were run on an Invitrogen NativePAGE Bis-Tris Native PAGE gel. The Hoch-WT protein displays multiple oligomeric states, which we tentatively assign as monomer, dimer and decamer oligomerisation states. In contrast the H63A displays a single major oligomerisation state.

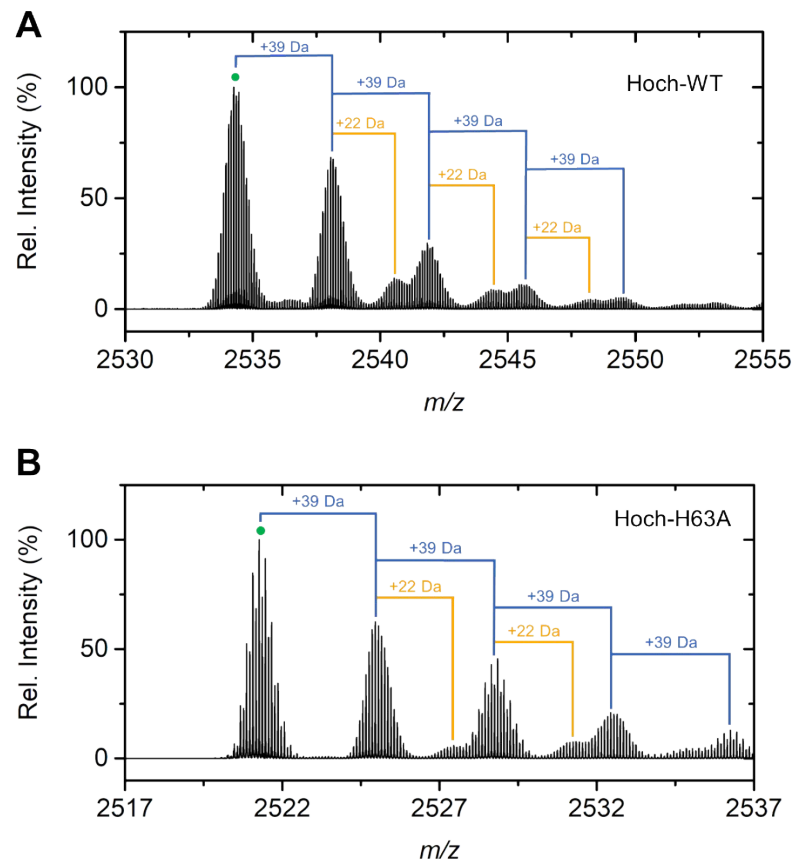

231  
232

233 *Figure S3. High Resolution Native FT-ICR Mass Spectra of Hoch-WT (A) and Hoch-*  
234 *H63A (B). The 10+ Dimer Charge State is shown for each.*

235 High resolution MS spectra of the 10+ dimer charge state of Hoch-WT (A) and Hoch-H63A  
236 (B). The peaks corresponding to the theoretical mass of dimer with no adducts is highlighted  
237 by green circles. Potassium and potassium-sodium adduct series are shown by blue and  
238 orange lines respectively. No indication of Fe<sup>2+</sup> binding (monoisotopic  $\Delta$ mass +54 Da) was  
239 observed in the dimer state of either variant.

240  
241



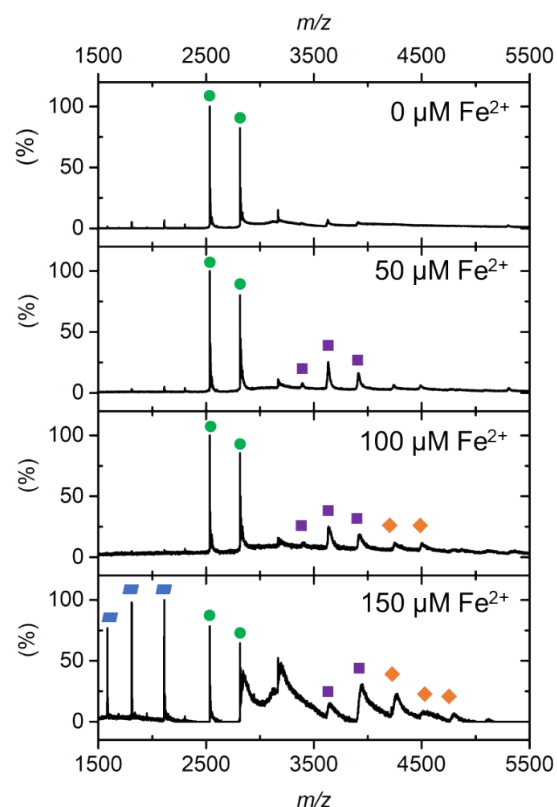

**Figure S4. Iron Mediated Dimer Association of Hoch-WT**

Hoch-WT was titrated with various iron concentrations before native nESI analysis. *Top panel:* native nESI spectrum of Hoch-WT displaying a charge state distribution consistent with dimer (green circles). *Lower panels:* Higher order assemblies – tetramer (charge states highlighted with purple squares) and hexamer (charge states highlighted with orange diamonds) appear with the addition of iron. Titration with 150  $\mu\text{M}$  iron leads to the appearance of overlapping adducts, preventing accurate peak assignment. Consequently, higher activation energy was required, causing the monomer charge state distribution to be observed (blue parallelograms).

254 HDX MS Results

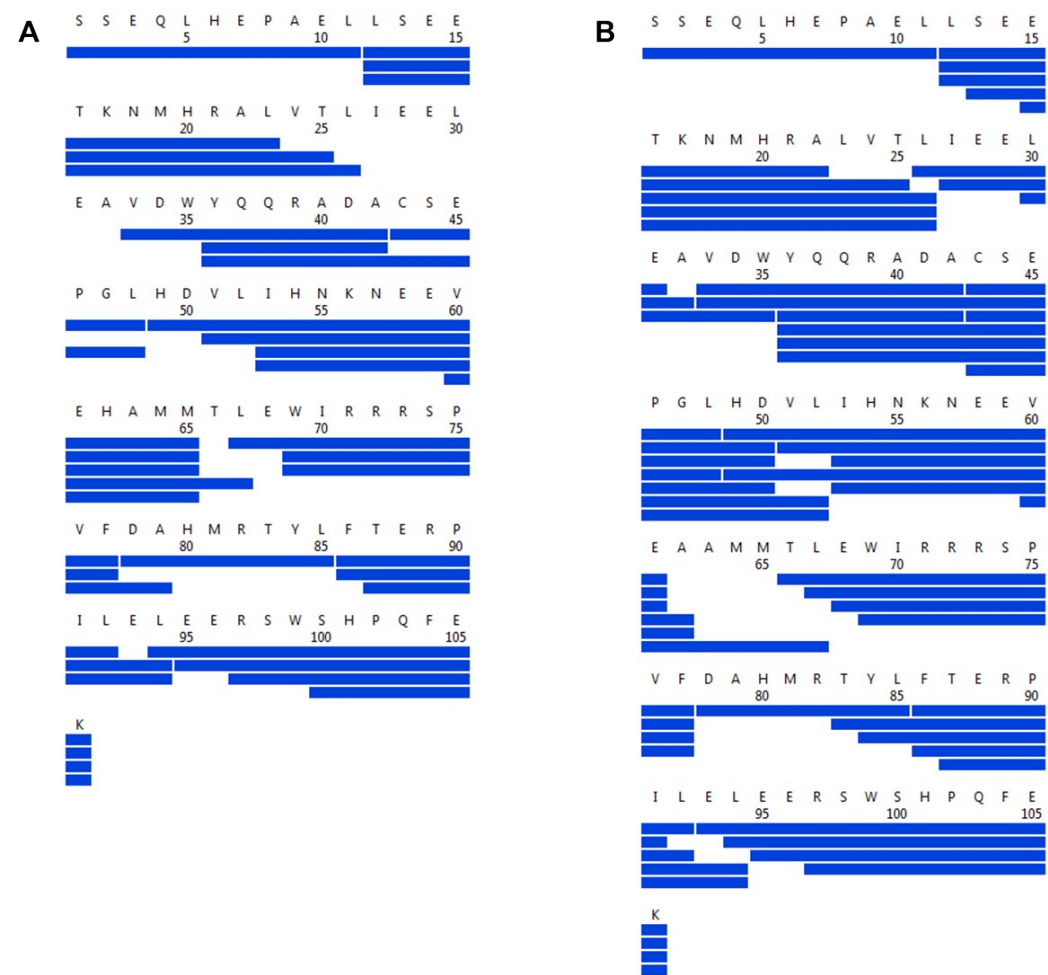

255 HDX S1. Peptide coverage maps for (A) Hoch-WT and (B) Hoch-H63A after HDX and pepsin digest.  
256 Peptides observed by MS in all HDX timepoints are represented by blue bars. (A) Pepsin digestion of Hoch-WT resulted in 24 peptide providing  
257 94% protein sequence coverage. (B) Pepsin digestion of Hoch-H63A resulted in 38 peptides, providing 100% protein sequence coverage.

A

| Sequence          | Start (aa) | End (aa) | Exchangers | WT Deuterium uptake (Da) |          |       |          |        |           |        |           |         |            |
|-------------------|------------|----------|------------|--------------------------|----------|-------|----------|--------|-----------|--------|-----------|---------|------------|
|                   |            |          |            | (10s)                    | (10s) SD | (30s) | (30s) SD | (120s) | (120s) SD | (500s) | (500s) SD | (1800s) | (1800s) SD |
| SSEQLHEPAEL       | 1          | 11       | 9          | 2.41                     | 0.08     | 2.60  | 0.09     | 2.88   | 0.13      | 3.15   | 0.07      | 3.38    | 0.29       |
| LSEETKNMHRAL      | 12         | 23       | 11         | 0.88                     | 0.09     | 0.97  | 0.08     | 1.23   | 0.09      | 1.43   | 0.07      | 1.67    | 0.31       |
| LSEETKNMHRALVT    | 12         | 25       | 13         | 0.92                     | 0.04     | 0.97  | 0.05     | 1.20   | 0.06      | 1.46   | 0.06      | 1.64    | 0.21       |
| LSEETKNMHRALVTL   | 12         | 26       | 14         | 0.97                     | 0.06     | 1.08  | 0.03     | 1.32   | 0.05      | 1.64   | 0.04      | 1.78    | 0.21       |
| VDWYQQRADA        | 33         | 42       | 9          | 0.29                     | 0.06     | 0.36  | 0.06     | 0.66   | 0.08      | 1.01   | 0.07      | 1.26    | 0.19       |
| YQQRADA           | 36         | 42       | 6          | 0.26                     | 0.06     | 0.36  | 0.04     | 0.64   | 0.05      | 0.95   | 0.03      | 1.19    | 0.19       |
| YQQRADACSEPL      | 36         | 48       | 11         | 1.56                     | 0.07     | 1.86  | 0.05     | 2.37   | 0.11      | 2.77   | 0.04      | 3.07    | 0.36       |
| CSEPL             | 43         | 48       | 4          | 0.83                     | 0.07     | 0.96  | 0.05     | 1.13   | 0.04      | 1.22   | 0.04      | 1.41    | 0.10       |
| HDVLIHNKNEEVE     | 49         | 61       | 12         | 0.63                     | 0.03     | 0.33  | 0.09     | 0.34   | 0.01      | 0.60   | 0.08      | 0.98    | 0.09       |
| HDVLIHNKNEEVEHAMM | 49         | 65       | 16         | 0.37                     | 0.12     | 0.43  | 0.12     | 0.58   | 0.12      | 0.76   | 0.12      | 0.81    | 0.18       |
| VLIHNKNEEVEHAMM   | 51         | 65       | 14         | 0.20                     | 0.05     | 0.24  | 0.02     | 0.31   | 0.03      | 0.41   | 0.01      | 0.42    | 0.09       |
| IHNKNEEVEHAMM     | 53         | 65       | 12         | 0.20                     | 0.04     | 0.23  | 0.02     | 0.28   | 0.03      | 0.35   | 0.03      | 0.42    | 0.05       |
| IHNKNEEVEHAMMTL   | 53         | 67       | 14         | 0.19                     | 0.06     | 0.20  | 0.06     | 0.30   | 0.05      | 0.35   | 0.07      | 0.39    | 0.09       |
| VEHAMM            | 60         | 65       | 5          | 0.00                     | 0.03     | 0.02  | 0.03     | 0.03   | 0.03      | 0.02   | 0.03      | 0.02    | 0.04       |
| LEWIRRRSPVF       | 67         | 77       | 9          | 0.52                     | 0.06     | 0.58  | 0.06     | 0.63   | 0.05      | 0.67   | 0.06      | 0.75    | 0.09       |
| WIRRRSPVF         | 69         | 77       | 7          | 0.46                     | 0.02     | 0.50  | 0.02     | 0.56   | 0.03      | 0.62   | 0.02      | 0.73    | 0.08       |
| WIRRRSPVFDA       | 69         | 79       | 9          | 0.41                     | 0.06     | 0.50  | 0.06     | 0.62   | 0.16      | 0.57   | 0.04      | 0.62    | 0.08       |
| DAHMRTYL          | 78         | 85       | 7          | 0.49                     | 0.06     | 0.48  | 0.10     | 0.57   | 0.05      | 0.69   | 0.08      | 0.87    | 0.17       |
| FTERPIL           | 86         | 92       | 5          | 1.34                     | 0.07     | 1.48  | 0.05     | 1.72   | 0.07      | 1.88   | 0.01      | 2.12    | 0.15       |
| FTERPILEL         | 86         | 94       | 7          | 2.02                     | 0.10     | 2.27  | 0.07     | 2.62   | 0.10      | 2.92   | 0.07      | 3.18    | 0.27       |
| TERPILEL          | 87         | 94       | 6          | 1.77                     | 0.10     | 2.02  | 0.07     | 2.36   | 0.10      | 2.67   | 0.08      | 2.88    | 0.24       |
| LEERSWSHPQFEK     | 94         | 106      | 11         | 2.27                     | 0.10     | 2.55  | 0.08     | 2.90   | 0.14      | 3.16   | 0.03      | 3.43    | 0.28       |
| EERSWSHPQFEK      | 95         | 106      | 10         | 1.98                     | 0.11     | 2.26  | 0.08     | 2.56   | 0.14      | 2.79   | 0.05      | 3.00    | 0.23       |
| RSWSHPQFEK        | 97         | 106      | 8          | 1.64                     | 0.10     | 1.85  | 0.03     | 2.16   | 0.14      | 2.28   | 0.05      | 2.49    | 0.16       |
| SHPQFEK           | 100        | 106      | 5          | 1.17                     | 0.11     | 1.41  | 0.14     | 1.54   | 0.12      | 1.71   | 0.09      | 2.00    | 0.19       |

258

259

260

261

262

B

| Sequence          | Start (aa) | End (aa) | Exchangers | H63A Deuterium uptake (Da) |          |       |          |        |           |        |           |         |            |
|-------------------|------------|----------|------------|----------------------------|----------|-------|----------|--------|-----------|--------|-----------|---------|------------|
|                   |            |          |            | (10s)                      | (10s) SD | (30s) | (30s) SD | (120s) | (120s) SD | (500s) | (500s) SD | (1800s) | (1800s) SD |
| SSEQLHEPAEL       | 1          | 11       | 9          | 2.04                       | 0.36     | 2.60  | 0.07     | 2.76   | 0.08      | 3.30   | 0.14      | 3.60    | 0.07       |
| LSEETKNMHRA       | 12         | 22       | 10         | 1.10                       | 0.26     | 1.47  | 0.04     | 2.03   | 0.04      | 2.55   | 0.07      | 3.14    | 0.03       |
| LSEETKNMHRALVT    | 12         | 25       | 13         | 1.22                       | 0.28     | 1.65  | 0.05     | 2.29   | 0.04      | 2.80   | 0.11      | 3.33    | 0.05       |
| LSEETKNMHRALVTL   | 12         | 26       | 14         | 1.22                       | 0.28     | 1.75  | 0.02     | 2.41   | 0.03      | 2.90   | 0.09      | 3.48    | 0.06       |
| SEETKNMHRALVTL    | 13         | 26       | 13         | 1.12                       | 0.25     | 1.54  | 0.08     | 2.24   | 0.03      | 2.69   | 0.17      | 3.14    | 0.20       |
| ETKNMHRALVTL      | 15         | 26       | 11         | 0.45                       | 0.10     | 0.57  | 0.04     | 0.89   | 0.06      | 1.27   | 0.07      | 1.55    | 0.04       |
| LIEELE            | 26         | 31       | 5          | 0.05                       | 0.07     | 0.19  | 0.09     | 0.22   | 0.04      | 0.28   | 0.04      | 0.29    | 0.02       |
| IEELEA            | 27         | 32       | 5          | 0.12                       | 0.01     | 0.12  | 0.01     | 0.13   | 0.01      | 0.13   | 0.01      | 0.13    | 0.01       |
| LEAVDW            | 30         | 35       | 5          | 0.05                       | 0.03     | 0.09  | 0.01     | 0.14   | 0.01      | 0.20   | 0.04      | 0.29    | 0.03       |
| VDWYQQRADA        | 33         | 42       | 9          | 0.33                       | 0.08     | 0.80  | 0.06     | 2.25   | 0.13      | 2.88   | 0.17      | 3.60    | 0.06       |
| VDWYQQRADACSEPLHD | 33         | 50       | 16         | 2.68                       | 0.34     | 3.33  | 0.16     | 3.53   | 0.16      | 4.07   | 0.22      | 4.33    | 0.17       |
| YQQRADA           | 36         | 42       | 6          | 0.31                       | 0.07     | 0.75  | 0.07     | 1.93   | 0.10      | 2.37   | 0.06      | 2.72    | 0.04       |
| YQQRADACSEPL      | 36         | 48       | 11         | 1.52                       | 0.28     | 2.37  | 0.07     | 3.47   | 0.10      | 4.18   | 0.16      | 4.77    | 0.07       |
| YQQRADACSEPLHD    | 36         | 50       | 13         | 1.61                       | 0.36     | 2.16  | 0.59     | 3.68   | 0.08      | 4.49   | 0.23      | 5.24    | 0.04       |
| YQQRADACSEPLHDVL  | 36         | 52       | 15         | 1.29                       | 0.36     | 2.23  | 0.08     | 3.87   | 0.12      | 4.50   | 0.19      | 5.18    | 0.09       |
| CSEPL             | 43         | 48       | 4          | 0.73                       | 0.16     | 1.05  | 0.04     | 1.14   | 0.02      | 1.36   | 0.08      | 1.47    | 0.02       |
| CSEPLHD           | 43         | 50       | 6          | 0.98                       | 0.25     | 1.36  | 0.09     | 1.48   | 0.03      | 1.85   | 0.10      | 2.08    | 0.12       |
| CSEPLHDVL         | 43         | 52       | 8          | 0.78                       | 0.19     | 1.20  | 0.08     | 1.81   | 0.04      | 2.34   | 0.09      | 2.79    | 0.10       |
| HDVLIHNKNEEVE     | 49         | 61       | 12         | 0.46                       | 0.04     | 0.89  | 0.08     | 2.27   | 0.10      | 2.52   | 0.16      | 3.10    | 0.17       |
| HDVLIHNKNEEVEA    | 49         | 62       | 13         | 0.35                       | 0.16     | 0.81  | 0.18     | 1.98   | 0.18      | 2.43   | 0.15      | 2.93    | 0.15       |
| VLIHNKNEEVE       | 51         | 61       | 10         | 0.41                       | 0.28     | 0.77  | 0.24     | 1.41   | 0.25      | 1.63   | 0.25      | 1.89    | 0.24       |
| IHNKNEEVE         | 53         | 61       | 8          | 0.31                       | 0.05     | 0.59  | 0.05     | 1.02   | 0.02      | 1.21   | 0.04      | 1.43    | 0.03       |
| IHNKNEEVEA        | 53         | 62       | 9          | 0.24                       | 0.06     | 0.55  | 0.09     | 0.91   | 0.02      | 1.08   | 0.08      | 1.28    | 0.11       |
| VEAAMMTL          | 60         | 67       | 7          | 0.12                       | 0.02     | 0.38  | 0.02     | 0.76   | 0.08      | 0.81   | 0.02      | 0.95    | 0.04       |
| TLEWIRRRSPVF      | 66         | 77       | 10         | 0.35                       | 0.09     | 0.54  | 0.09     | 0.58   | 0.06      | 0.64   | 0.07      | 0.97    | 0.14       |
| LEWIRRRSPVF       | 67         | 77       | 9          | 0.50                       | 0.12     | 0.66  | 0.02     | 0.72   | 0.03      | 0.81   | 0.02      | 1.05    | 0.03       |
| EWIRRRSPVF        | 68         | 77       | 8          | 0.48                       | 0.11     | 0.66  | 0.03     | 0.73   | 0.03      | 0.83   | 0.06      | 1.06    | 0.04       |
| WIRRRSPVF         | 69         | 77       | 7          | 0.52                       | 0.11     | 0.60  | 0.03     | 0.72   | 0.03      | 0.83   | 0.04      | 1.09    | 0.03       |
| DAHMRTYL          | 78         | 85       | 7          | 1.04                       | 0.03     | 1.10  | 0.14     | 1.42   | 0.03      | 1.71   | 0.08      | 1.91    | 0.02       |
| TYLFTERPI         | 83         | 91       | 7          | 1.54                       | 0.43     | 2.44  | 0.10     | 2.77   | 0.08      | 3.25   | 0.13      | 3.67    | 0.15       |
| YLFTERPIL         | 84         | 92       | 7          | 1.22                       | 0.27     | 1.80  | 0.14     | 2.19   | 0.02      | 2.39   | 0.05      | 3.06    | 0.07       |
| FTERPIL           | 86         | 92       | 5          | 1.46                       | 0.02     | 1.68  | 0.04     | 1.89   | 0.02      | 2.23   | 0.11      | 2.37    | 0.08       |
| FTERPILEL         | 86         | 94       | 7          | 1.76                       | 0.50     | 2.50  | 0.03     | 2.81   | 0.03      | 3.30   | 0.14      | 3.61    | 0.06       |
| TERPILEL          | 87         | 94       | 6          | 1.72                       | 0.01     | 2.06  | 0.02     | 2.25   | 0.07      | 2.94   | 0.12      | 3.19    | 0.09       |
| LEERSWSHPQFEK     | 93         | 106      | 12         | 2.35                       | 0.31     | 2.97  | 0.03     | 3.24   | 0.06      | 3.78   | 0.15      | 4.03    | 0.06       |
| LEERSWSHPQFEK     | 94         | 106      | 11         | 2.26                       | 0.36     | 2.60  | 0.25     | 3.02   | 0.18      | 3.50   | 0.23      | 3.82    | 0.18       |
| EERSWSHPQFEK      | 95         | 106      | 10         | 1.57                       | 0.87     | 2.24  | 0.44     | 2.66   | 0.41      | 3.17   | 0.44      | 3.45    | 0.41       |
| RSWSHPQFEK        | 97         | 106      | 8          | 1.52                       | 0.20     | 1.93  | 0.04     | 2.10   | 0.03      | 2.51   | 0.07      | 3.00    | 0.14       |

263 HDX S2. Recorded uptake of deuterium for each peptide and timepoint observed in HDX-MS of Hoch-WT(A) and Hoch-H63A (B).  
 264 For each peptic peptide observed in the HDX MS analysis, the deuterium uptake (in Da) and standard deviation of triplicate data is shown for  
 265 each timepoint (10s, 30s, 120s, 500s, 1800s) for each peptide. The number of exchangeable backbone amide hydrogens is also stated  
 266 (Exchangers). Peptides highlighted in yellow are represented and discussed in the main text

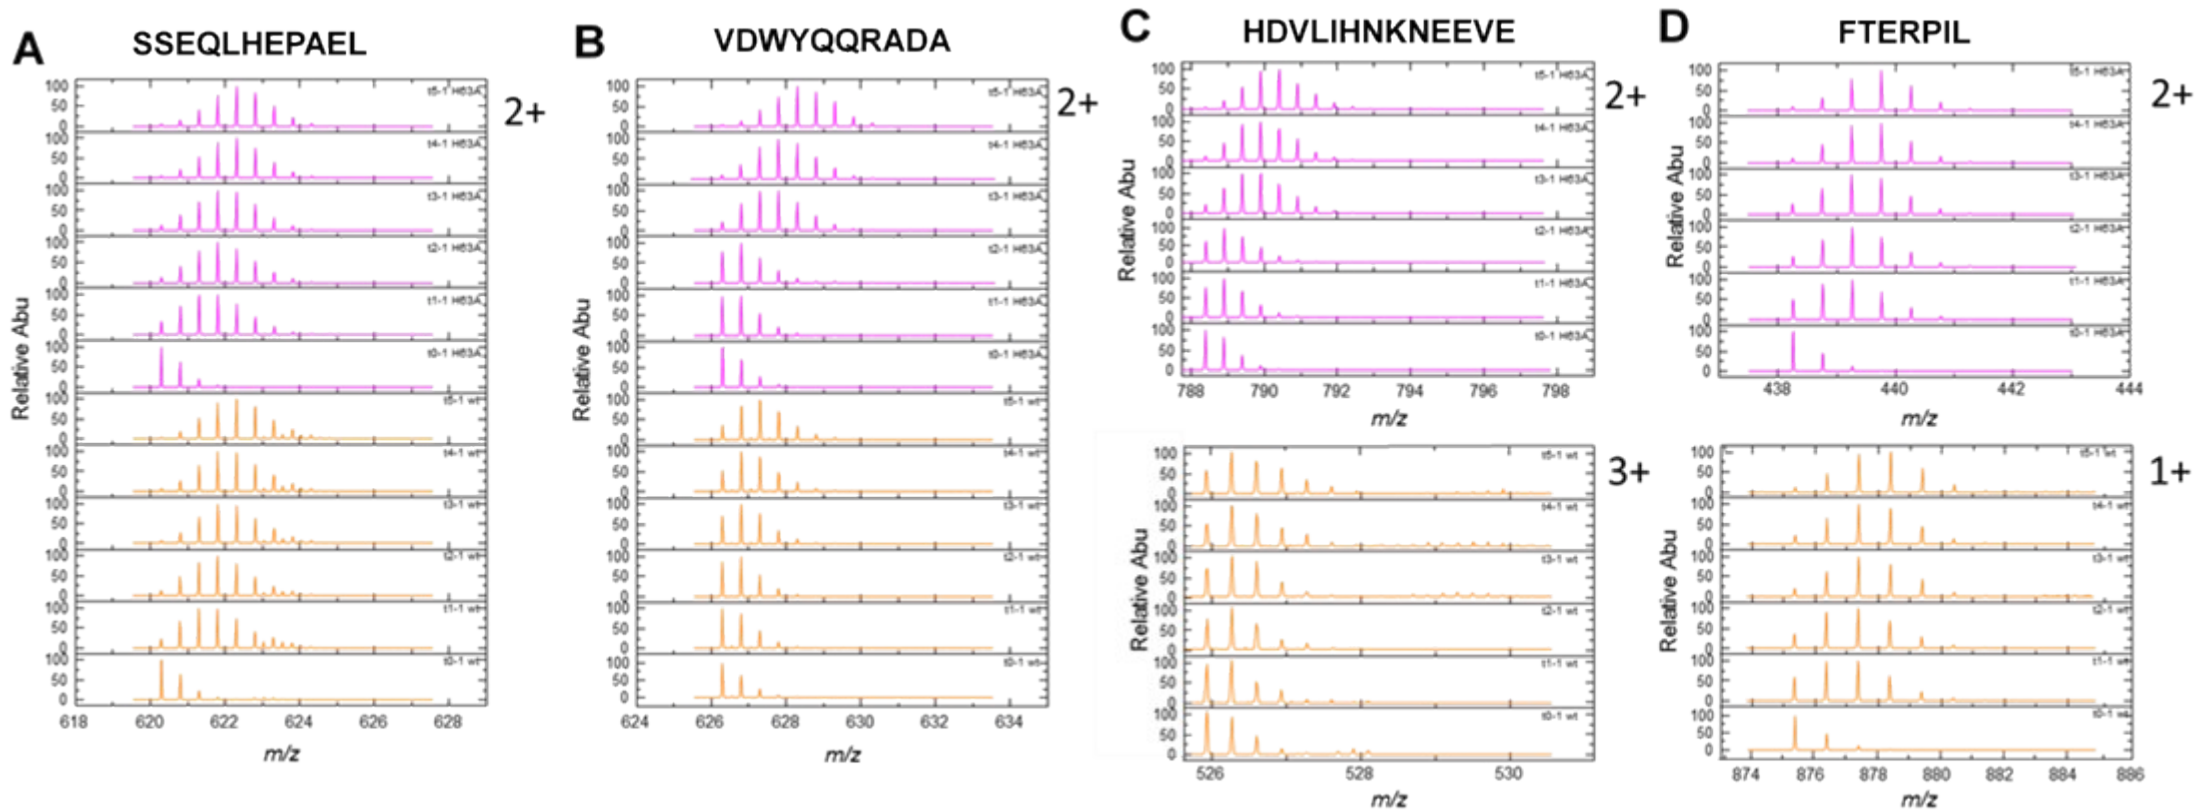

267

268 *HDX S3. Stacked mass spectral data displaying deuterium uptake over time for the four peptides highlighted in text. Hoch-WT*  
 269 *(orange) and Hoch-H63A (magenta).*

270 **(A)** aa1-11 SSEQLHEPAEL; **(B)** aa33-42 VDWYQQRADA; **(C)** aa49-61 HDVLIHNKNEEVE and **(D)** aa86-92 FTERPIL. Comparative analysis  
 271 of the same peptic peptide obtain from Hoch-WT (orange) and Hoch-H63A (magenta). The isotope distribution recorded for each timepoint are  
 272 displayed stacked plots (T0 (bottom) to T5 (top)).

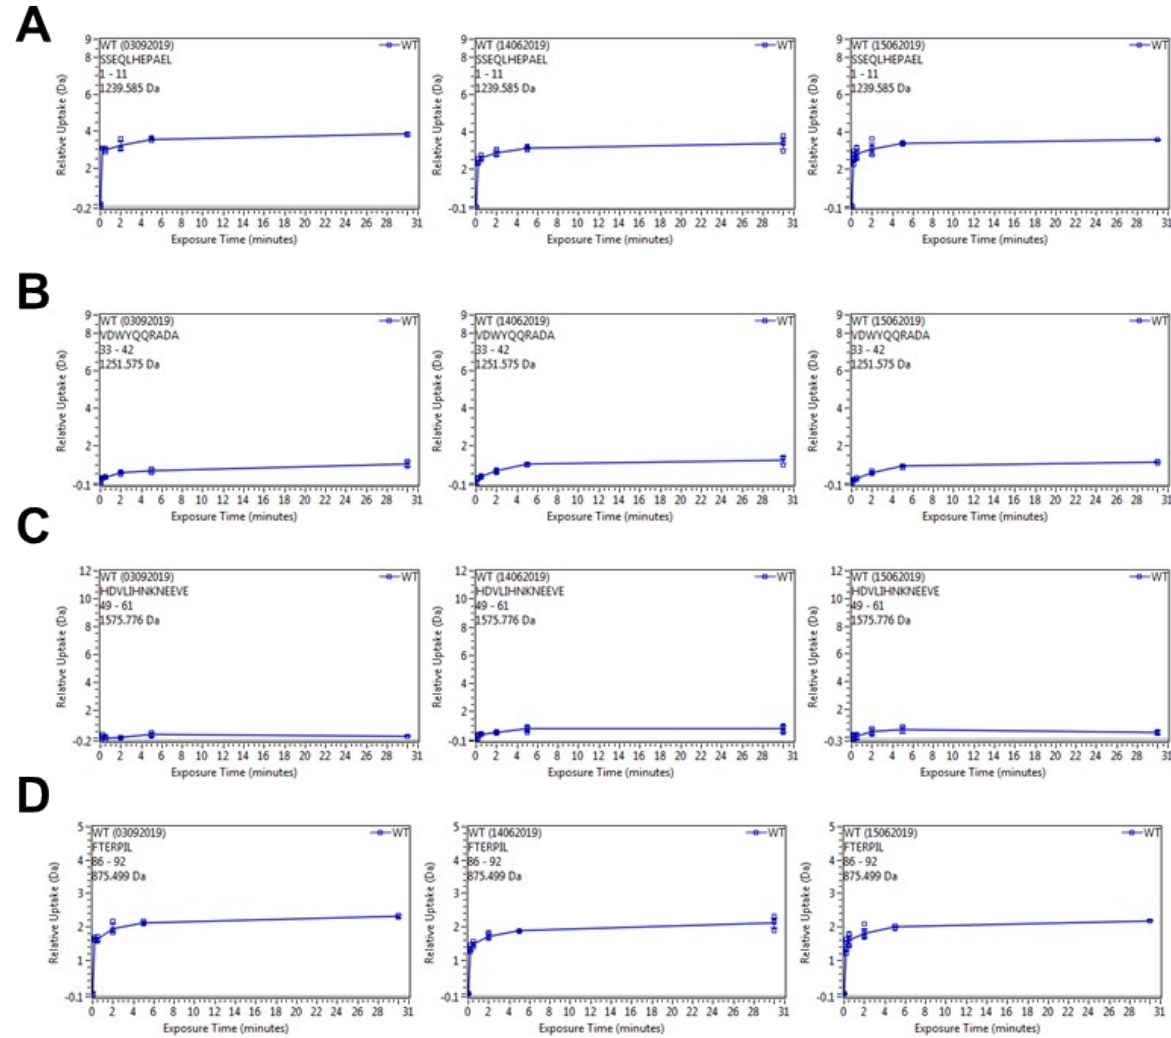

**HDX S4. HDX uptake plots for the four peptides highlighted in the text from HDX-MS analysis for Hoch-WT. (A) aa1-11 SSEQLHEPAEL, (B) aa33-42 VDWYQQRADA; (C) HDVLIHKNKEEVE; (D) aa86-92 FTERPIL.** For each peptide, the three panels represent the deuterium uptake for a biological repeat. Each biological repeat was measured in technical triplicate (represented by the error bars in the plots)

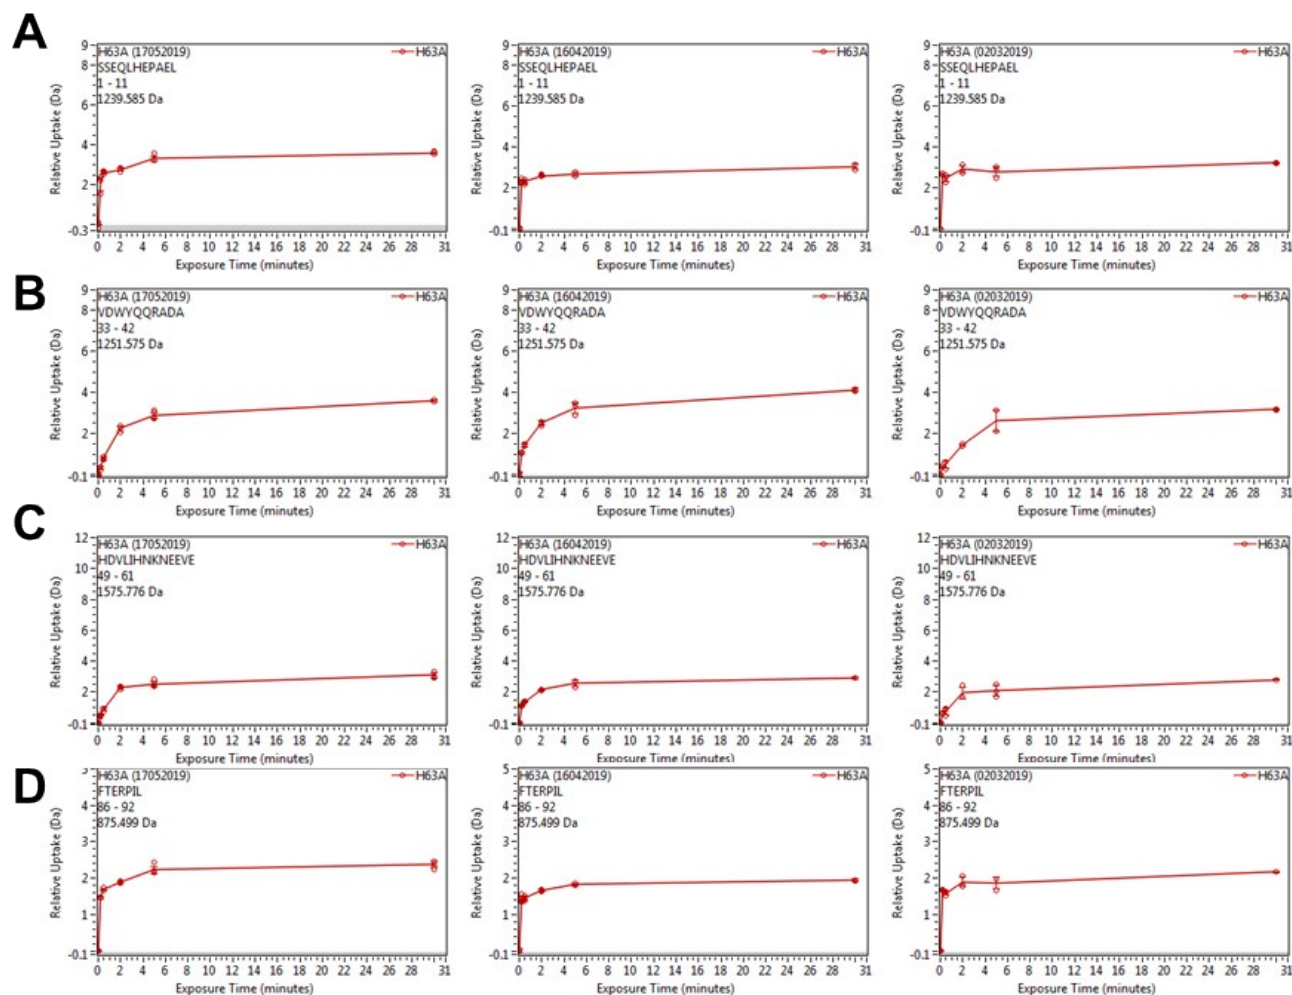

HDX S5. HDX uptake plots for the four peptides highlighted in the text from HDX-MS analysis for Hoch-H63A. **(A)** aa1-11 SSEQLHEPAEL, **(B)** aa33-42 VDWYQQRADA; **(C)** HDVLIHNKNEEVE; **(D)** aa86-92 FTERPIL. For each peptide, the three panels represent the deuterium uptake for a biological repeat. Each biological repeat was measured in technical triplicate (represented by the error bars in the plots)

1

## References

- 1 D. He, C. Piergentili, J. Ross, E. Tarrant, L. R. Tuck, C. Logan Mackay, Z. McIver, K. J. Waldron, D. J. Clarke and J. Marles-Wright, *Biochem. J.*, 2019, **476**, 975–989.
